# Supplementary material for: Is an integrated model of school eye health delivery more cost-effective than a vertical model? An implementation research in Zanzibar
Source: PubMed Central journal article supplement — BMJ Open Ophthalmol. 2021 Jan 19;6(1):e000561. doi: 10.1136/bmjophth-2020-000561 (PMC7817824; doi:10.1136/bmjophth-2020-000561), 2021-01-19
Supplement: bmjophth-2020-000561supp001.pdf [file bmjophth-2020-000561supp001.pdf]

## The vision screening and referral process

### Using the vision screener for distance screening

- The vision screener has 2 lines of symbols of different sizes for vision screening.
- The child is able to see the target if he/she correctly indicates the direction in which the legs of the symbol are pointing
- Inability to see the row of smaller sized symbols indicates that the child's vision is below normal and he or she needs to further examine and treated at a facility with an eye clinic with an ophthalmic clinical officer, or an optometrist and necessary equipment for basic eye examination and refraction.
- Inability to see the single big symbol indicates that the child has severe vision impairment and would require a detailed eye exam ideally at an eye department with an ophthalmologist and necessary equipment and infrastructure

### Procedure:

- Take the vision screener close to the child and explain that you will point at the 5 "E"s and s/he should point at the direction of the "legs" of the "E".
- If the child normally wears eyeglasses to see at the distance, tell her/him to wear them on during the test
- Ask the child to stand 3 meters from the chart (measure the distance using the tape or rope provided).
- Ask the child to cover their left eye with the occluder, or with the palm of their hand (NOT their fingers as they may peep between them!)
- Test the right eye first. Record the findings (see chart below)
- Then ask the child to cover the right eye to test the left eye. Record the findings (see below)
- Stand behind the vision screener and point at the row with small symbols

|                                                                                     |                                                                                                          |                                                                                     |                                                                                       |
|-------------------------------------------------------------------------------------|----------------------------------------------------------------------------------------------------------|-------------------------------------------------------------------------------------|---------------------------------------------------------------------------------------|
|  | <p>PASS if the child correctly indicates the direction of at least 4 of the 5 symbols with each eye.</p> |  | <p>FAIL if child correctly indicates the direction of 3 or less Es with each eye.</p> |
|-------------------------------------------------------------------------------------|----------------------------------------------------------------------------------------------------------|-------------------------------------------------------------------------------------|---------------------------------------------------------------------------------------|

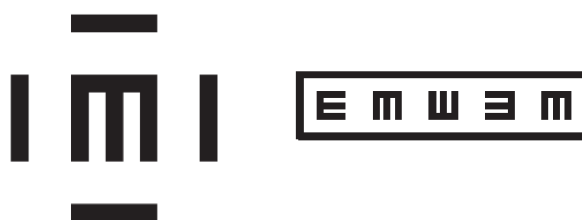

*The Vision Screener*

### What to do when a problem is detected when conducting the vision screening?

- Children who fail the vision screening must be referred to an eye department for a comprehensive eye examination. Refer to the instruction on the next page on how to fill in the referral form.
